# Supplementary material for: Quantum transport of two-species Dirac fermions in dual-gated three-dimensional topological insulators
Source: PubMed Central journal article supplement (PMC4857391; doi:10.1038/ncomms11434), 2016-05-04
Supplement: ncomms11434-s1.pdf [file ncomms11434-s1.pdf]

## Supplementary Information

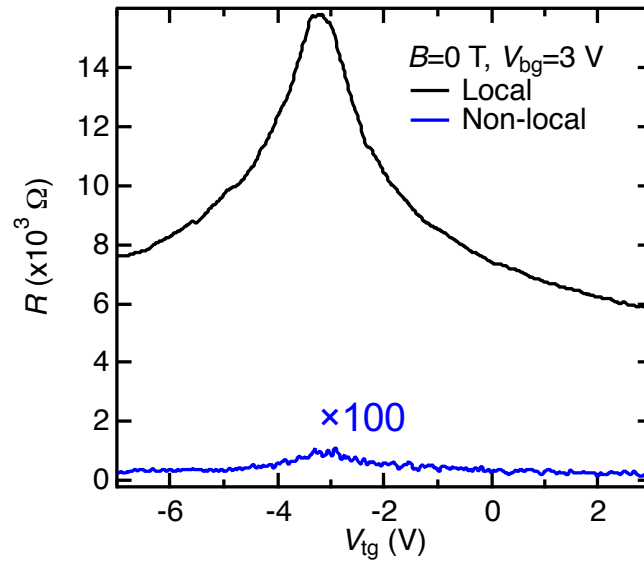

**Supplementary Figure 1 | Measured local and nonlocal resistance without magnetic field.** Local resistance  $R_{xx}$  (a) and non-local resistance  $R_{nl}$  (b) as functions of  $V_{tg}$  at  $V_{bg}=3$  V and  $B=0$  T,  $T=0.3$  K. The non-local resistance  $R_{nl}$  shown here is multiplied by a factor of hundred. The data shown in this supplementary file are all from the same Sample A as that in the main text.

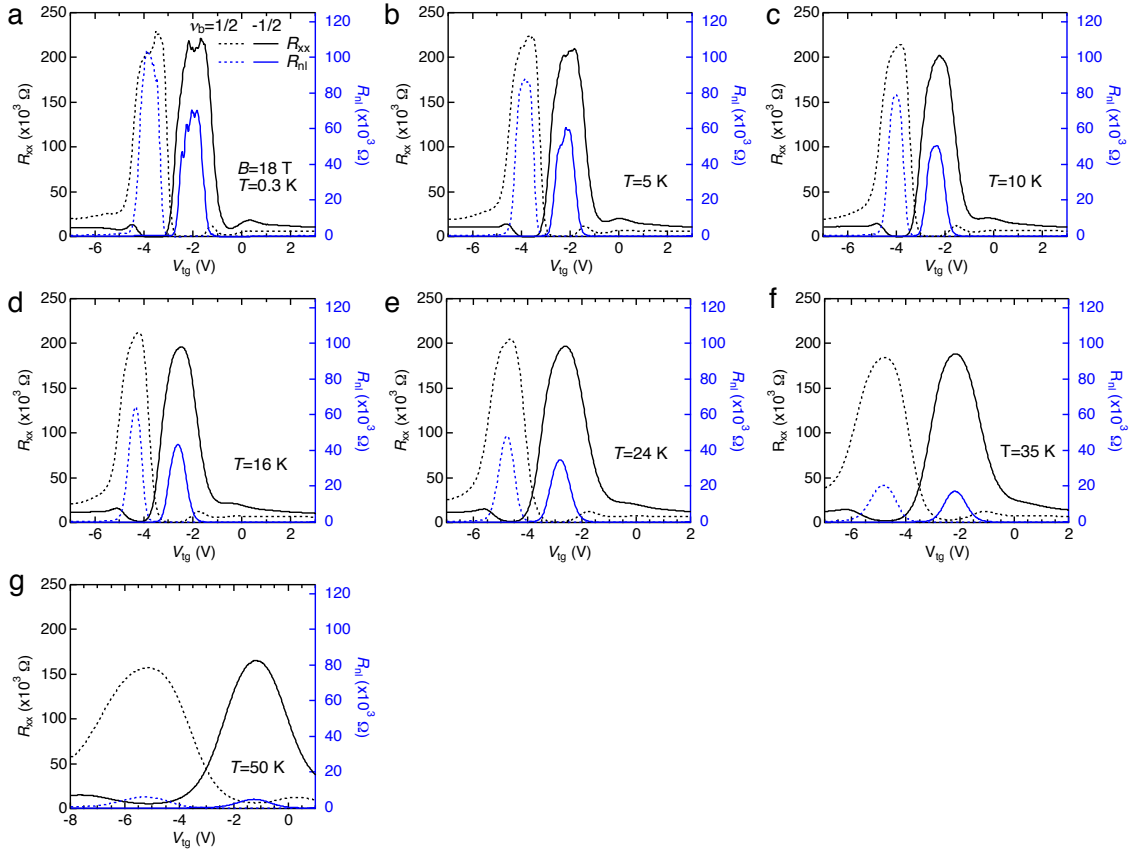

**Supplementary Figure 2 | Temperature dependence of the local and nonlocal resistance.** (a)-(g) Local resistance  $R_{xx}$  and nonlocal resistance  $R_{nl}$  versus  $V_{tg}$  at fixed bottom surface filling factor  $\nu_b=1/2$  (dashed) and  $-1/2$  (solid) measured at  $B=18$  T at different temperatures. At total filling factor  $\nu=0$  states, the nonlocal resistance  $R_{nl}$  decreases more rapidly with increasing temperature while the local resistance  $R_{xx}$  maintains large value up to 50 K.

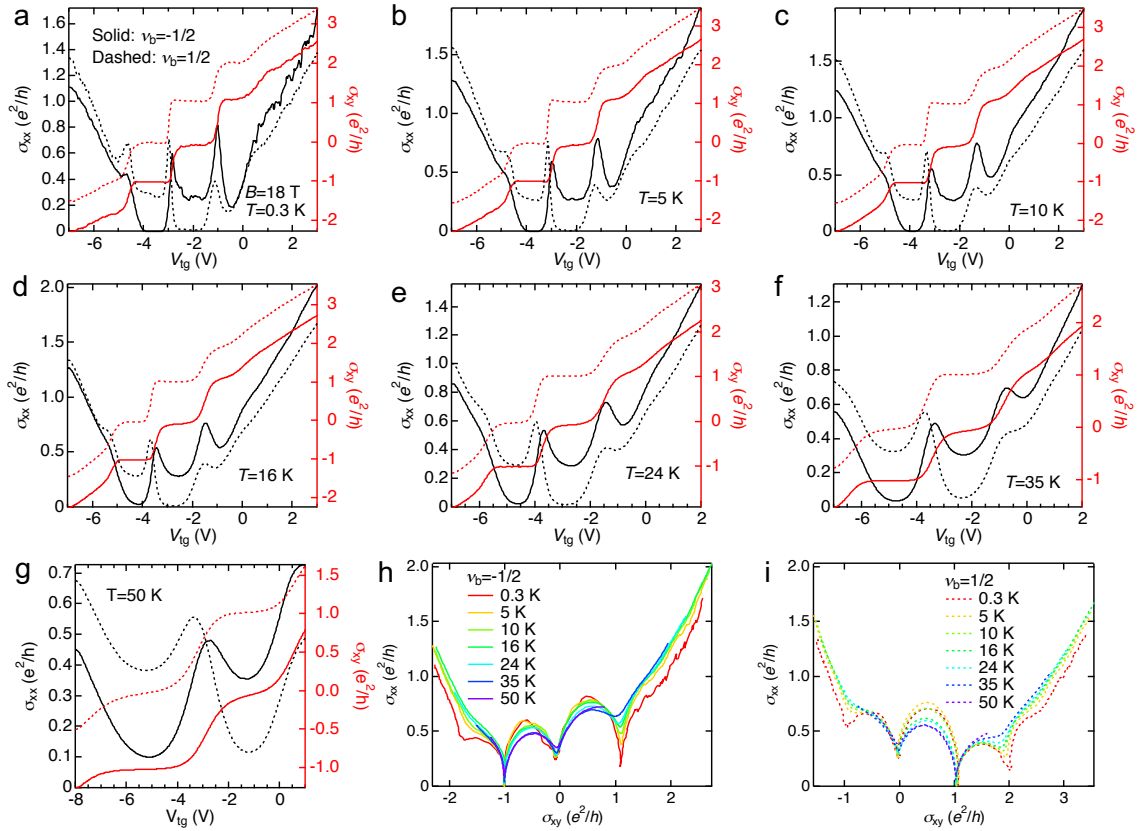

**Supplementary Figure 3 | Temperature dependence of the longitudinal and Hall resistivity.** (a)-(g) Longitudinal conductivity  $\sigma_{xx}$  and Hall conductivity  $\sigma_{xy}$  versus  $V_{tg}$  at fixed bottom surface filling factor  $\nu_b=1/2$  (dashed) and  $-1/2$  (solid) measured at  $B=18$  T at different temperatures. (h) and (i) show  $\sigma_{xx}$  versus  $\sigma_{xy}$  at  $\nu_b=-1/2$  and  $1/2$  respectively at different temperatures.
